# Supplementary material for: Differential requirements of androgen receptor in luminal progenitors during prostate regeneration and tumor initiation
Source: eLife journal article supplement (doi:10.7554/elife.28768), 2018-01-15
Supplement: supp [file elife-28768-supp-v1.zip]

Archive with 8 entries (8 files):
- elife_poa_e28768_Figure_2_source_data_1.docx
- elife_poa_e28768_Figure_3_source_data_1.docx
- elife_poa_e28768_Figure_4_source_data_1.docx
- elife_poa_e28768_Figure_1_source_data_1.docx
- elife_poa_e28768_Figure_4_figure_supplement_1.pdf
- elife_poa_e28768_Figure_6_source_data_1.docx
- elife_poa_e28768_Transparent_Reporting_File.docx
- elife_poa_e28768_Supplementary_file_1.docx
