# Supplementary material for: Differential requirements of androgen receptor in luminal progenitors during prostate regeneration and tumor initiation
Source: eLife journal article supplement (doi:10.7554/elife.28768), 2018-01-15
Supplement: supp [file elife-28768-supp-v1.zip › elife_poa_e28768_Figure_1_source_data_1.docx]

**Figure 1 source data. Quantitation of CARNs and AR-deleted CARNs *in vivo*.**

**A. Flow-sorting analysis of CARNs and AR-deleted CARNs**

| *Nkx3.1CreERT2/+; R26R-YFP/+* | | *Nkx3.1CreERT2/+; Arflox/Y; R26R-YFP/+* | |
| --- | --- | --- | --- |
| Mouse ID | Percentage | Mouse ID | Percentage |
| 2709 | 0.22% | 2701 | 0.38% |
| 2710 | 0.20% | 2718 | 0.27% |
| 2711 | 0.35% | 8701 | 0.34% |
| 8706 | 0.62% | 8702 | 0.24% |
| 8708 | 0.42% | 8703 | 0.30% |
| Mean ± SD | 0.36 ± 0.17% | Mean ± SD | 0.31 ± 0.06% |

| **B. Marker analysis of CARNs and AR-deleted CARNs** | | | | | |
| --- | --- | --- | --- | --- | --- |
| **AR** | | | | | |
| Genotype | Mouse ID | | Total YFP+ cells | AR+YFP+ cells (%) | | |
| *Nkx3.1CreERT2/+; R26R-YFP/+* | 2725, 9902, 9905 | | 223 | 223 (100%) | | |
| *Nkx3.1CreERT2/+; Arflox/Y; R26R-YFP/+* | 2729, 2730, 9901, 9903 | | 395 | 51 (12.9%) | | |
|  | | | | | | |
| **CK8** | | | | | | |
| Genotype | Mouse ID | | Total YFP+ cells | CK8+YFP+ cells (%) | | |
| *Nkx3.1CreERT2/+; R26R-YFP/+* | 2724, 2725, 2726, 8082 | | 113 | 113 (100%) | | |
| *Nkx3.1CreERT2/+; Arflox/Y; R26R-YFP/+* | 2728, 2729, 2730 | | 281 | 281 (100%) | | |
|  | | | | | | |
| **CK18** | |  | |  |  |
| Genotype | Mouse ID | | Total YFP+ cells | CK18+YFP+ cells (%) | | |
| *Nkx3.1CreERT2/+; R26R-YFP/+* | 9902, 9905, 2725, 8082 | | 127 | 127 (100%) | | |
| *Nkx3.1CreERT2/+; Arflox/Y; R26R-YFP/+* | 9901, 9903, 9904, 2730 | | 148 | 148 (100%) | | |
|  | | | | | | |
| **CK5** | |  | |  |  |
| Genotype | Mouse ID | | Total YFP+ cells | CK5+YFP+ cells (%) | | |
| *Nkx3.1CreERT2/+; R26R-YFP/+* | 2724, 2725, 2726, 8082 | | 108 | 0 (0%) | | |
| *Nkx3.1CreERT2/+; Arflox/Y; R26R-YFP/+* | 2728, 2729, 2730 | | 222 | 0 (0%) | | |
|  | | | | | | |
| **p63** |  | | | | | |
| Genotype | Mouse ID | | Total YFP+ cells | p63+YFP+ cells (%) | | |
| *Nkx3.1CreERT2/+; R26R-YFP/+* | 9902, 9905, 2724 | | 107 | 0 (0%) | | |
| *Nkx3.1CreERT2/+; Arflox/Y; R26R-YFP/+* | 9901, 9903, 9904, 2730 | | 170 | 0 (0%) | | |
