# Supplementary material for: Differential requirements of androgen receptor in luminal progenitors during prostate regeneration and tumor initiation
Source: eLife journal article supplement (doi:10.7554/elife.28768), 2018-01-15
Supplement: supp [file elife-28768-supp-v1.zip › elife_poa_e28768_Figure_3_source_data_1.docx]

**Figure 3 source data. Quantitation of BrdU incorporation and renal grafting data.**

**A. Analysis of BrdU incorporation during regeneration**

| **BrdU injected from day 1 through 4, analyzed at 28 days** | | | | | | |
| --- | --- | --- | --- | --- | --- | --- |
| Genotype | Mouse ID | YFP+ cells (% ± SD) | | | | |
| Total | AR+ | AR– | AR+BrdU+ | AR–BrdU+ |
| *Nkx3.1CreERT2/+; R26R-YFP/+* | 9200, 9204,  9212 | 264 | 264 | 0 | 129  (50.9 ± 11.8%) | 0 |
| *Nkx3.1CreERT2/+; Arflox/Y; R26R-YFP/+* | 9201,  9202,  9205 | 118 | 50 |  | 37 | 0 |
|  | 68 | 0 | 35  (62.9 ± 14.9%) |
|  | | | | | | |
| **BrdU injected from day 11 through 14, analyzed at 28 days** | | | | | | |
| Genotype | Mouse ID | YFP+ cells (% ± SD) | | | | |
| Total | AR+ | AR– | AR+BrdU+ | AR–BrdU+ |
| *Nkx3.1CreERT2/+; R26R-YFP/+* | 8792,  8793,  8795 | 272 | 272 | 0 | 32  (11.1 ± 6.2%) | 0 |
| *Nkx3.1CreERT2/+; Arflox/Y; R26R-YFP/+* | 8789,  8790,  8791 | 208 | 77 |  | 9 | 0 |
|  | 131 | 0 | 0 |

| **B. Renal grafts using 10 cells (CARNs or AR-deleted CARNs)** | | | |
| --- | --- | --- | --- |
| Genotype | Total | AR+ grafts recovered (%) | AR– grafts recovered (%) |
| *Nkx3.1CreERT2/+; R26R-YFP/+* | 16 | 11 (68.8%) | N/A |
| *Nkx3.1CreERT2/+; Arflox/Y; R26R-YFP/+* | 16 | 5 (31.2%) | 2 (12.5%) |
