# Supplementary figures and images for: Differential requirements of androgen receptor in luminal progenitors during prostate regeneration and tumor initiation
Source: eLife journal article supplement (doi:10.7554/elife.28768), 2018-01-15

Figure 4 –  
figure supplement 1

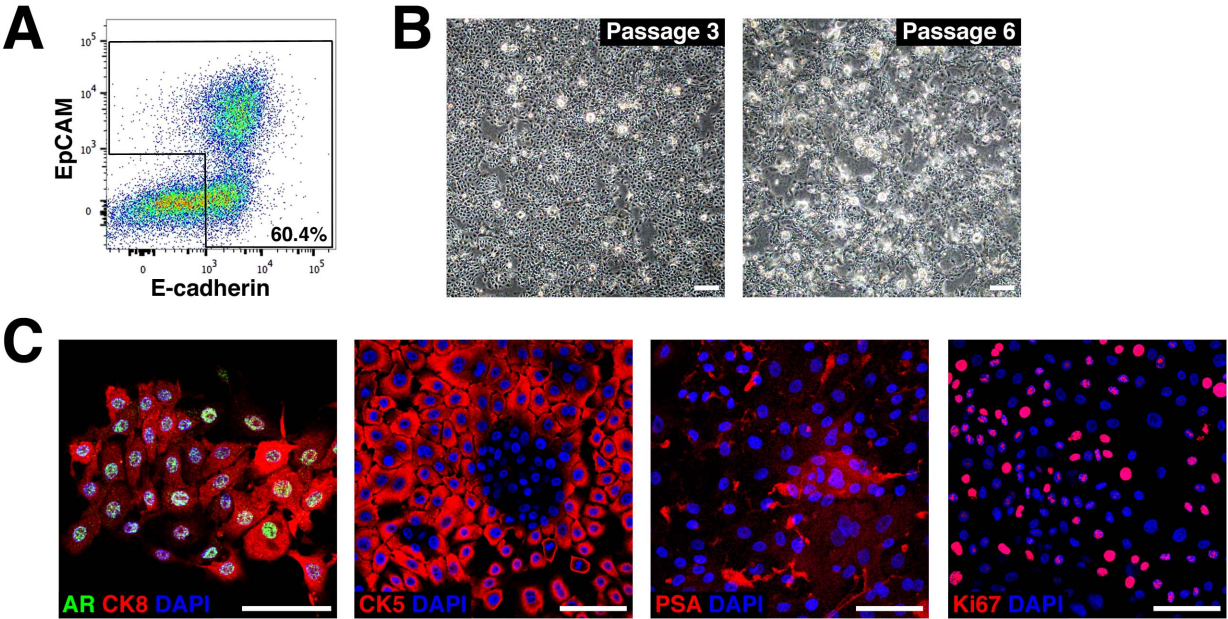

Supplement: supp [file elife-28768-supp-v1.zip › elife_poa_e28768_Figure_4_figure_supplement_1.pdf]
